# Supplementary material for: Evaluation of Mesh Closure of Laparotomy and Extraction Incisions in Open and Laparoscopic Colorectal Surgery: A Systematic Review and Meta-Analysis
Source: Preprints.org preprint supplement (doi:10.20944/preprints202410.0478.v1), 2024-10-08

**Figure 3:** **Forest plots for measured outcomes. IH: incisional hernia.**

1. **Overall IH incidence**


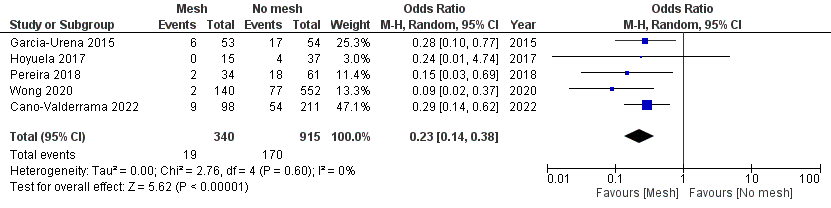


1-a: IH in Open surgery (Midline laparotomy) subgroup


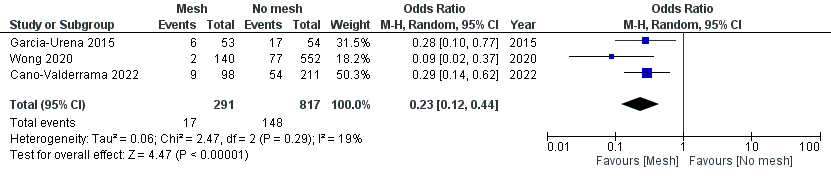


1-b: IH in laparoscopic (Extraction Incision) subgroup


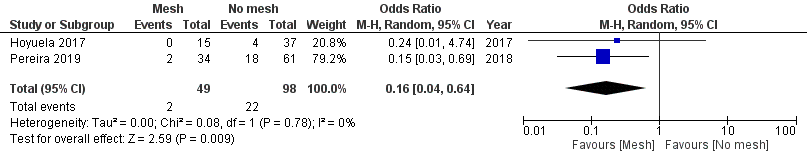


1. **Evisceration rate**


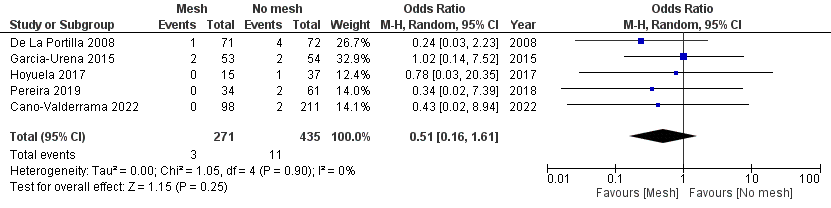


1. **Surgical Site Infection**


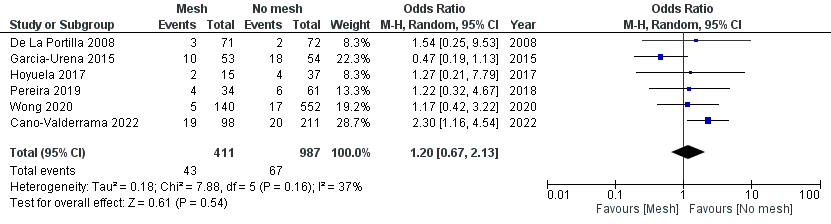


1. **Seroma formation**


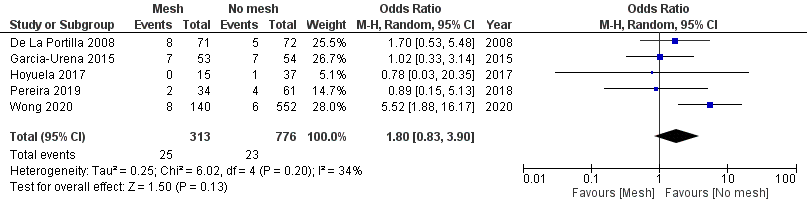


1. **Length of hospital stay (LOS)**


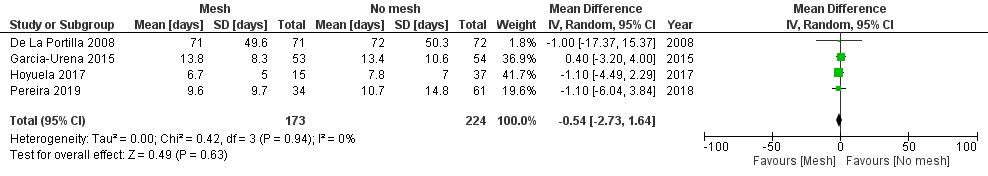

Supplement: Supplementary file 1 [file supplementary]
